# Supplementary material for: Fluorescent probes for formaldehyde based on formaldehyde-promoted C–N cleavage of azanyl carbamates
Source: Royal Society of Chemistry journal article supplement (doi:10.1039/d4ob01198h), 2024-01-01
Supplement: d4ob01198h1.pdf [file d4ob01198h1.pdf]

## Electronic Supplementary Information

# Fluorescent Probes for Formaldehyde based on Formaldehyde-promoted C-N Cleavage of Azanyl Carbamates

Wanjin Xing,<sup>a</sup> Yang Li,<sup>a</sup> Yulin Que,<sup>a</sup> Huan Xu,<sup>\*b</sup> Wei Wang,<sup>\*c</sup> and Kaiyan Lou<sup>\*a</sup>

<sup>a</sup> State Key Laboratory of Bioreactor Engineering, Shanghai Frontiers Science Center of Optogenetic Techniques for Cell Metabolism, Shanghai Key Laboratory of New Drug Design, and Shanghai Key Laboratory of Chemical Biology, School of Pharmacy, East China University of Science & Technology, 130 Meilong Road, Shanghai 200237, China.

<sup>b</sup> School of Public Health, Anhui University of Science and Technology, Hefei, Anhui Province, 231131, China.

<sup>c</sup> Department of Pharmacology and Toxicology and BIO5 Institute, University of Arizona, Tucson, AZ 85721-0207, United States.

## Table of Contents

|                                                                        |         |
|------------------------------------------------------------------------|---------|
| <b>General Information</b>                                             | S2      |
| <b>Part I: Probe Design</b>                                            | S3-S6   |
| <b>Part II: Probe Synthesis and Structural Characterizations</b>       | S7-S8   |
| <b>Part III: Additional Fluorescence and Absorption Studies</b>        | S9-S12  |
| <b>Part IV: HRMS and <sup>1</sup>HNMR Studies of Reaction Products</b> | S13-S14 |
| <b>Part V: Theoretical Calculations</b>                                | S15-S16 |
| <b>Part VI: Detection of FA in Live Cells</b>                          | S17-S20 |
| <b>Part VII: NMR and HRMS Data</b>                                     | S21-S23 |
| <b>References</b>                                                      | S24     |

## General Information

Commercial reagents were purchased from commercial suppliers and used as received, unless otherwise stated.

$^1\text{H}$  and  $^{13}\text{C}$  NMR spectra were recorded on Bruke DRX 400 (400 MHz). Mass Spectra were obtained from East China University of Science and Technology LC-Mass spectral facility. UV-Vis spectra were collected on a Shimadzu UV-1800 spectrophotometer. Fluorescence spectra were collected on a FluoroMax-4 (Horiba Scientific) fluorescence spectrophotometer with slit widths were set at 3 nm both for excitation and emission unless otherwise stated. The pH measurements were carried out with a FE20 plus (Mettler Toledo) pH meter.

## Part I: Probe Design

### 1.1 Representative fluorescent probes for FA based on 2-aza-cope rearrangement

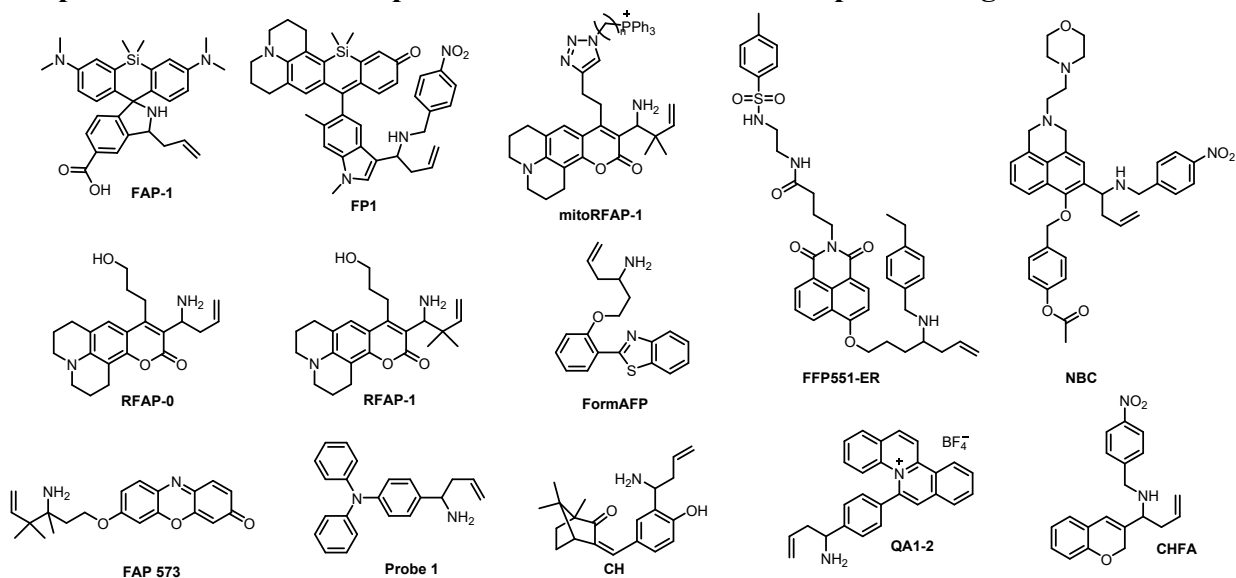

Figure S1 2-aza-cope rearrangement based fluorescent probes for FA.

### 1.2 Representative fluorescent probes for FA based on methylenehydrazine or formimine formation

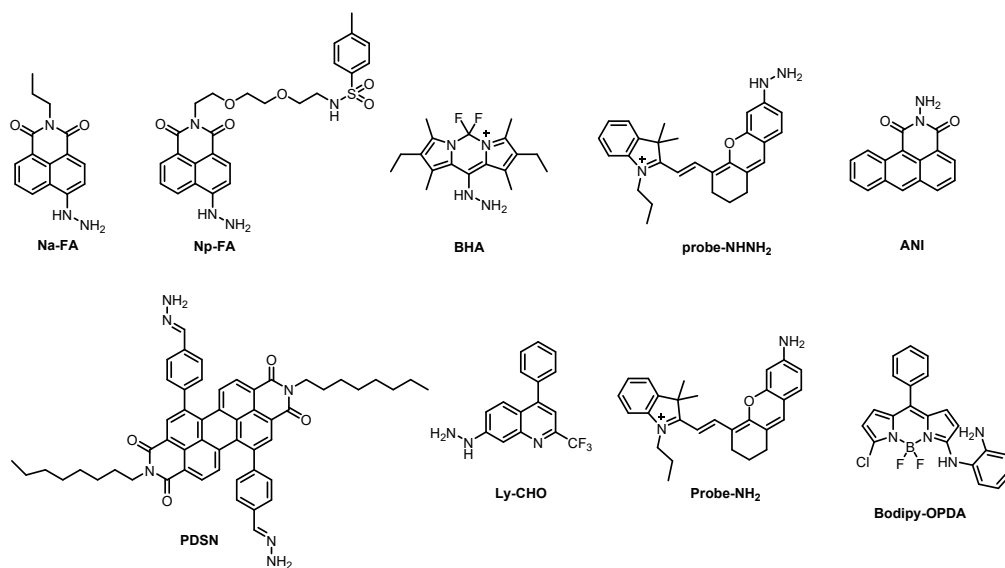

Figure S2 Methylenehydrazine or formimine formation based fluorescent probes for FA.

### 1.3 Representative fluorescent probes for FA based on diamine condensation/cyclization

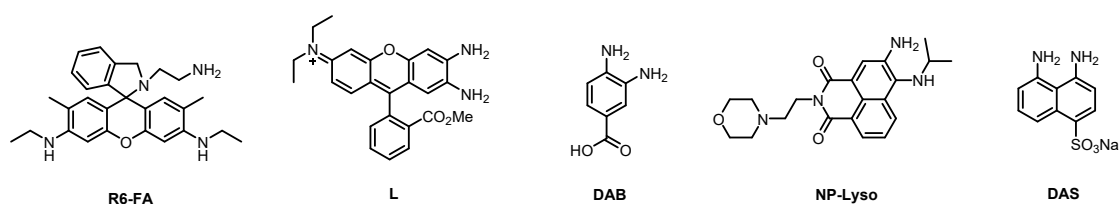

Figure S3 Diamine condensation/cyclization based fluorescent probes for FA.

## 1.4 Representative fluorescent probes for FA based on FA-induced intramolecularity

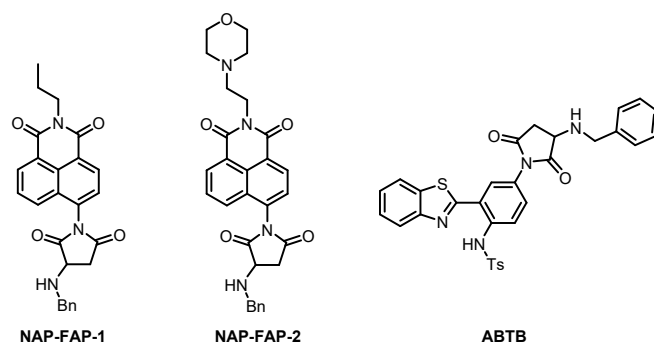

**Figure S4** FA-induced intramolecularity based fluorescent probes for FA.

**Table S1** Comparison of literature reported fluorescent probes for FA.

(N. A. means the information “not available” from the literature)

| Probe                        | Ex nm   | Em nm                       | LOD for FA $\mu\text{M}$ | Optimized condition for FA detection                                                                                             | Biological application                                               | Ref. |
|------------------------------|---------|-----------------------------|--------------------------|----------------------------------------------------------------------------------------------------------------------------------|----------------------------------------------------------------------|------|
| <b>FAP-1</b>                 | 645     | 662 $\uparrow$<br>(turn-on) | 5                        | 10 $\mu\text{M}$ probe + 100 $\mu\text{M}$ FA<br>2 h at 37 $^{\circ}\text{C}$ in PBS (20 mM,<br>pH = 7.4)                        | HEK293T cells.                                                       | 1    |
| <b>FP1</b>                   | 633     | 649 $\uparrow$<br>(turn-on) | 10                       | 1 $\mu\text{M}$ probe + 250 $\mu\text{M}$ FA<br>3 h at 37 $^{\circ}\text{C}$ in PBS (pH =<br>7.4)                                | HEK293TN cells<br>NS1 cells                                          | 2    |
| <b>RFP-0</b><br><b>RFP-1</b> | 420/470 | 510 $\uparrow$<br>(turn-on) | 0.3                      | 10 $\mu\text{M}$ probe + 100 $\mu\text{M}$ FA<br>2 h at 37 $^{\circ}\text{C}$ in PBS (20 mM,<br>pH = 7.4)                        | HEK293T, HeLa,<br>MCF-7, MCF-10A,<br>RKO, SH-SY5Y and<br>U-2OS cells | 3    |
| <b>FAP-573</b>               | 573     | 585 $\uparrow$<br>(turn-on) | N.A.                     | 10 $\mu\text{M}$ probe + 100 $\mu\text{M}$ FA<br>2 h at 37 $^{\circ}\text{C}$ in PBS (20 mM,<br>pH = 7.4)                        | HEK293T, ADH5 KO,<br>WT, HAP1 cells                                  | 4    |
| <b>FormAFP</b>               | 340     | 520 $\uparrow$<br>(turn-on) | 66 nM                    | 20 $\mu\text{M}$ probe + 500 $\mu\text{M}$ FA<br>70 min at 37 $^{\circ}\text{C}$ in EtOH/PBS<br>(1 : 50 v/v,<br>10 mM, pH = 7.4) | MCF7 cells                                                           | 5    |
| <b>MitoRFAP-1</b>            | 470     | 510 $\uparrow$<br>(turn-on) | N.A.                     | 10 $\mu\text{M}$ probe + 100 $\mu\text{M}$ FA<br>120 min at 37 $^{\circ}\text{C}$ in PBS (10<br>mM, pH = 7.4)                    | HEK293T cells<br>HeLa cells<br>HCT-116 cells<br>MCF-7 cells          | 6    |

|                             |     |                   |            |                                                                                                          |                                                                   |    |
|-----------------------------|-----|-------------------|------------|----------------------------------------------------------------------------------------------------------|-------------------------------------------------------------------|----|
| <b>FFP551-ER</b>            | 441 | 551↑<br>(turn-on) | N.A.       | 10 μM + 100 μM FA 120 min at 37 °C in PBS (10 mM, pH = 7.4)                                              | HeLa cells                                                        | 7  |
| <b>NBC</b>                  | 485 | 525↑<br>(turn-on) | 0.27       | 1 μM + 80 μM FA in PBS (100 mM, pH = 7.4)                                                                | HeLa cells<br>mice                                                | 8  |
| <b>Probe 1</b>              | 301 | 443↑<br>(turn-on) | 14         | 10 μM probe + 1 mM FA 60 min in DMSO/ buffer solution (1 : 4 v/v, pH = 7.4)                              | Gaoliang Jiu<br>sweet potato Jiu                                  | 9  |
| <b>CH</b>                   | 365 | 525↑<br>(turn-on) | 2.01       | 20 μM probe + 1.4 mM FA in DMF/PBS buffer solution (1 : 19 v/v, 2 mM pH = 7.4)                           | Zebrafishs<br>vermicelli<br>chicken feet<br>shrimp<br>Xuanwu Lake | 10 |
| <b>QA1-2</b>                | 410 | 481↑<br>(turn-on) | 5          | 10 μM probe + 10 mM FA at 37 °C in CH <sub>3</sub> CN/PBS buffer solution (1 : 9 v/v, pH = 7.4)          | filter paper strips                                               | 11 |
| <b>CHFA</b>                 | 360 | 517↑<br>(turn-on) | 1.71       | 20 μM probe + 20 μM FA 180 min in at 37 °C CH <sub>3</sub> CN/ PBS buffer solution (1 : 9 v/v, pH = 7.4) | HeLa cells                                                        | 12 |
| <b>Na-FA</b>                | 440 | 543↑<br>(turn-on) | 0.71       | 5 μM probe + 100 μM FA 30 min in PBS (10 mM, pH = 7.4)                                                   | HeLa cells<br>liver slides                                        | 13 |
| <b>Np-FA</b>                | 450 | 540↑<br>(turn-on) | N.A.       | 6 μM probe + 150 μM FA 45 min in PBS (10 mM, pH = 7.4)                                                   | HeLa cells<br>Zebrafishs<br>Mouse brain tissue<br>slices          | 14 |
| <b>BHA</b>                  | 420 | 466↑<br>(turn-on) | 0.18       | 10 μM probe + 100 μM FA 32 min in PBS (10 mM, pH = 7.4)                                                  | HeLa cells                                                        | 15 |
| <b>Probe-NH<sub>2</sub></b> | 670 | 706↑<br>(turn-on) | 0.68       | 10 μM probe + 200 μM FA 10 min at 37 °C in PBS (10 mM, pH = 7.4)                                         | HepG2 cells<br>Zebrafish                                          | 16 |
| <b>ANI</b>                  | 440 | 518↑<br>(turn-on) | 0.98       | 10 μM probe + 13 mM FA 3 min in DMF/PBS buffer solution (4 : 6 v/v, pH = 7.4)                            | HeLa cells                                                        | 17 |
| <b>PDSN</b>                 | 450 | 625↑<br>(turn-on) | 11.9<br>nM | 20 μM probe + 2 mM FA in DMF/PBS buffer solution (1 : 1, v/v, pH = 7.4)                                  | Food samples                                                      | 18 |

|                             |     |                               |            |                                                                                          |                                          |    |
|-----------------------------|-----|-------------------------------|------------|------------------------------------------------------------------------------------------|------------------------------------------|----|
| <b>Ly-CHO</b>               | 400 | 514↑<br>(turn-on)             | 17.2<br>nM | 10 μM probe + 100 μM FA in<br>PBS (10 mM, pH = 7.4)                                      | 4T1 cells<br>mice                        | 19 |
| <b>Probe-NH<sub>2</sub></b> | 670 | 708↓<br>(turn-off)            | 1.87       | 10 μM probe +500 μM FA in<br>PBS (10 mM, pH = 7.4)                                       | filter paper strips<br>mice              | 20 |
| <b>Bodipy-<br/>OPDA</b>     | 482 | 548↑<br>(turn-on)             | 0.104      | 10 μM probe + 1000 μM FA<br>2 h at 37 °C in<br>MeCN/HEPES (1:9, v/v, 20<br>mM, pH = 7.4) | filter paper strips<br>HeLa cells        | 21 |
| <b>R6-FA</b>                | 530 | 560↑<br>(turn-on)             | 0.77       | 10 μM probe +20 μM FA in<br>DMF/PBS buffer solution (1 :<br>1, v/v, 25 mM, pH = 7.4)     | filter paper strips<br>HeLa cells        | 22 |
| <b>L</b>                    | 520 | 642↑<br>(turn-on)             | 8.3        | 5 μM probe +10 mM FA in<br>EtOH/Tris-HCl (3 : 7, v/v, 10<br>mM, pH = 7.4)                | L929 cells                               | 23 |
| <b>DAB</b>                  | 344 | 430↑<br>(turn-on)             | 79 nM      | 10 μM probe + 800 μM FA<br>15 min in PBS (10 mM, pH =<br>7.4)                            | HepG2 cells<br>HeLa cells<br>WI-38 cells | 24 |
| <b>NP-Lyso</b>              | 380 | 444↑<br>(turn-on)             | 0.27       | 10 μM probe + 2 mM FA 60<br>min in PBS (10 mM, pH =<br>5.4)                              | L929 cells<br>HeLa cells                 | 25 |
| <b>DAS</b>                  | 345 | 490↑<br>(turn-on)             | 1          | 5 μM probe + 800 μM FA<br>60 min in PBS (10 mM, pH =<br>7.4)                             | HepG2 cells                              | 26 |
| <b>NAP-FAP-1</b>            | 359 | 470↑<br>(turn-on)             | 0.48       | 1 μM probe + 200 μM FA 15<br>min in PBS (10 mM, pH =<br>7.4)                             | HeLa cells<br>THP-1 cells                | 27 |
| <b>NAP-FAP-2</b>            | 359 | 472↑<br>(turn-on)             | 0.145      | 1 μM probe + 500 μM FA 30<br>min in PBS (10 mM, pH =<br>7.4)                             | HeLa cells<br>THP-1 cells                | 27 |
| <b>ABTB</b>                 | 439 | 525↓440↑<br>(ratiometric<br>) | 0.43       | 10 μM probe +200 μM FA<br>in aqueous solution                                            | HeLa cells                               | 28 |

## Part II: Probe Synthesis and Structure Characterizations

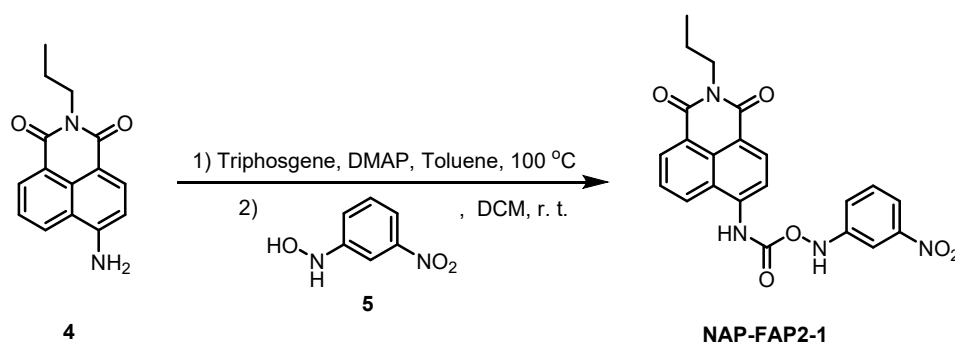

Scheme S1 Synthesis of the probe **NAP-FAP2-1**

### 2.1 3-nitrophenylazanyl *N*-(*N*-propyl-1,8-naphthalimide-4-yl)carbamate (**NAP-FAP2-1**)

To a solution of **4**<sup>29</sup> (25.4 mg, 0.100 mmol) and 4-dimethylaminopyridine (DMAP, 36.7 mg, 0.30 mmol) in 2 mL toluene under nitrogen atmosphere, was added triphosgene (45.5 mg, 0.15 mmol). The reaction mixture was heated to 100 °C and stirred at 100 °C for 6 h. After cooling to room temperature, a solution of *N*-(3-nitrophenyl) hydroxylamine (**5**)<sup>30</sup> (20 mg, 0.13 mmol) in 2 mL anhydrous dichloromethane was added to the reaction mixture. The reaction mixture was stirred at room temperature overnight. After the solvent was removed in vacuum by a rotavapor, the residue was purified by silica gel chromatography column using methylene chloride and methanol (20:1, v/v) as eluent to afford 21 mg (48 % yield) of the title probe **NAP-FAP2-1** as yellow solid. <sup>1</sup>H NMR (400 MHz, DMSO-*d*<sub>6</sub>) δ 11.39 (s, 1H), 10.14 (s, 1H), 8.60 (t, *J* = 2.3 Hz, 1H), 8.57 - 8.48 (m, 3H), 8.14 (dd, *J* = 8.3, 2.3 Hz, 1H), 8.06 (d, *J* = 8.0 Hz, 1H), 7.96 (dd, *J* = 8.2, 2.3 Hz, 1H), 7.91 (t, *J* = 7.9 Hz, 1H), 7.68 (t, *J* = 8.3 Hz, 1H), 4.03 (t, *J* = 7.4 Hz, 2H), 1.67 (h, *J* = 7.4 Hz, 2H), 0.94 (t, *J* = 7.4 Hz, 3H). <sup>13</sup>C NMR (150 MHz, DMSO-*d*<sub>6</sub>): δ 163.4, 162.9, 153.8, 147.7, 143.3, 140.1, 131.1, 130.9, 129.8, 128.2, 126.4, 126.0, 125.9, 124.3, 122.2, 122.0, 118.4, 117.6, 112.6, 41.1, 20.8, 11.3. ESI-HRMS: *m/z* [M+Na]<sup>+</sup> calcd for [C<sub>22</sub>H<sub>18</sub>N<sub>4</sub>O<sub>6</sub>Na]<sup>+</sup>: 457.1119, found: 457.1122.

### 2.2 3-nitrophenylazanyl *N*-(2-(4-methylbenzene-1-sulfonylamino)ethyl)-1,8-naphthalimide-4-yl)carbamate (**NAP-FAP2-2**)

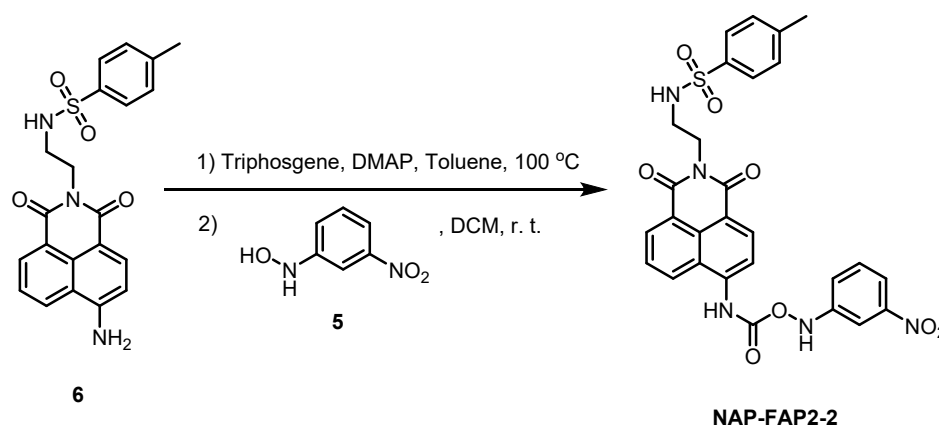

Scheme S2 Synthesis of the probe **NAP-FAP2-2**

To a solution of **6**<sup>31</sup> (20.5 mg, 0.050 mmol) and 4-dimethylaminopyridine (DMAP, 18.4 mg, 0.15 mmol) in toluene (2 mL) under nitrogen atmosphere and triphosgene (22.8 mg, 0.075 mmol) was added. The reaction mixture was stirred at 100 °C for 6 h. then the solution of *N*-(3-nitrophenyl) hydroxylamine<sup>30</sup> (10 mg, 0.065 mmol) in 2 mL anhydrous dichloromethane was added to the reaction mixture. The reaction mixture was stirred at room temperature overnight. After the solvent was removed in vacuum by a rotavapor, the residue was purified by silica gel chromatography column using methylene chloride and methanol (20:1, v/v) as eluent to afford 8.0 mg (27 % yield) of the probe **NAP-FAP2-2** as yellow solid. <sup>1</sup>H NMR (400 MHz, DMSO-*d*<sub>6</sub>): δ 8.59 (t, *J* = 2.3 Hz, 1H), 8.51 - 8.40 (m, 3H), 8.14 (dd, *J* = 8.3, 2.2 Hz, 1H), 8.06 (d, *J* = 8.1 Hz, 1H), 7.93 (dd, *J* = 8.1, 2.3 Hz, 1H), 7.86 (t, *J* = 7.9 Hz, 1H), 7.75 (t, *J* = 6.4 Hz, 1H), 7.65 (t, *J* = 8.3 Hz, 1H), 7.59 (d, *J* = 8.1 Hz, 2H), 7.24 (d, *J* = 8.1 Hz, 2H), 4.12 (t, *J* = 6.6 Hz, 2H), 3.16-3.03 (m, 2H), 2.27 (s, 3H). <sup>13</sup>C NMR (125 MHz, DMSO-*d*<sub>6</sub>) δ 163.6, 163.1, 153.9, 147.8, 143.4, 142.5, 140.1, 137.6, 131.1, 130.8, 129.9, 129.9, 129.5(2C), 128.4, 126.5, 126.4(2C), 126.0, 124.4, 122.4, 122.0, 118.6, 117.7, 112.7, 40.1, 40.0, 20.9; ESI-HRMS: *m/z* [M+Na]<sup>+</sup> calcd for [C<sub>28</sub>H<sub>23</sub>N<sub>5</sub>O<sub>8</sub>SNa]<sup>+</sup>: 612.1160, found: 612.1163.



### Part III: Additional Fluorescence and Absorption Studies

All aqueous solutions were prepared using double distilled water. **NAP-FAP2-1** and **NAP-FAP2-2** stock solution (10 mM in dry DMSO) was prepared and stored at -20 °C. All fluorescence and absorption spectroscopic measurements were performed in 10 mM PBS buffer (pH 7.4) at 37 °C unless otherwise stated. Samples for absorption and fluorescence measurements were contained in 1 cm×1 cm quartz cuvettes (3.5 mL volume).

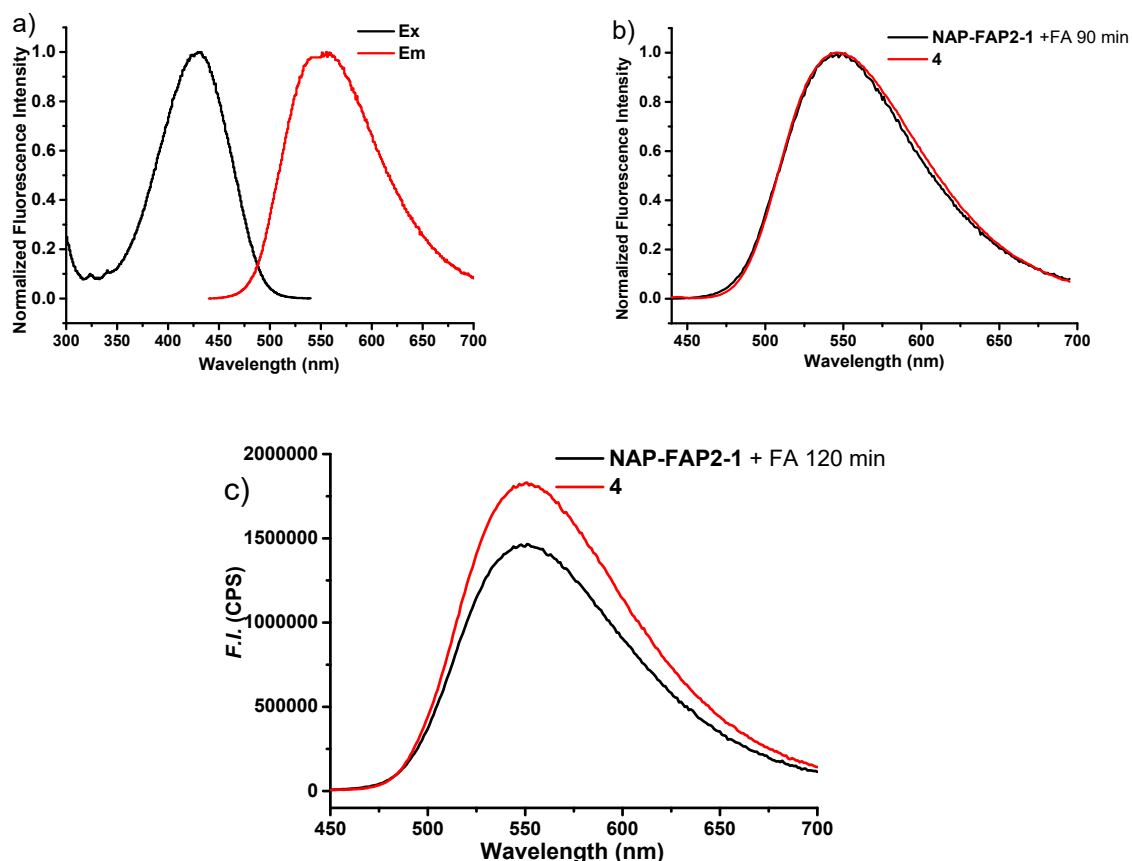

**Figure S5** a) Normalized fluorescence excitation ( $\lambda_{em} = 550$  nm) and emission spectra ( $\lambda_{ex} = 430$  nm) of the probe **NAP-FAP2-1** (1 μM) upon incubation with 50 μM FA for 90 min; b) Overlap of the normalized fluorescence emission spectrum of the **NAP-FAP2-1** (1 μM) upon incubation with 50 μM FA for 90 min and that of the 4-amino-1,8-naphthalimide **4** (1 μM,  $\lambda_{ex} = 430$  nm); c) Comparison of fluorescence emission spectrum of the reaction mixture of **NAP-FAP2-1** (1 μM) upon incubation with 50 μM FA for 120 min with that of the fluorescent product **4** (1 μM,  $\lambda_{ex} = 430$  nm).

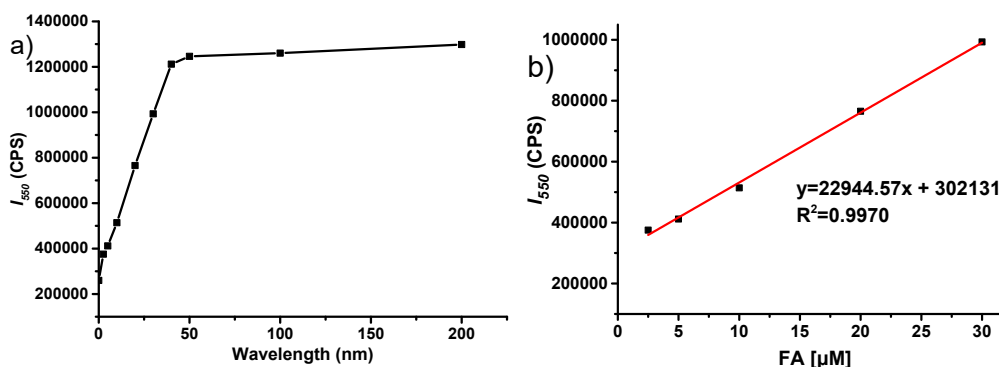

**Figure S6** a) Fluorescence intensity of the probe **NAP-FAP2-1** (1  $\mu\text{M}$ ) at 550 nm ( $\lambda_{\text{ex}}=430$  nm) after incubation with FA for 90 min versus [FA]. The maximum fluorescence intensity at 550 nm was achieved with addition of 50  $\mu\text{M}$  FA; b) Linear regression of the fluorescence intensity at 550 nm ( $\lambda_{\text{ex}}=430$  nm) versus FA concentrations (2.5 to 30  $\mu\text{M}$ ): the limit of detection (LOD,  $S/N=3$  and  $N=6748$  CPS) = 0.88  $\mu\text{M}$ .

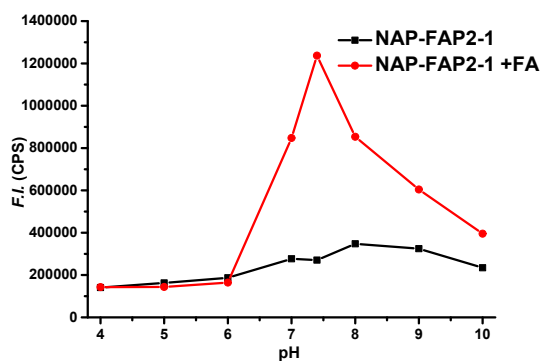

**Figure S7** pH-dependent fluorescence intensity at 550 nm ( $\lambda_{\text{ex}}=430$  nm) of the probe **NAP-FAP2-1** (1  $\mu\text{M}$ ) incubated with 50  $\mu\text{M}$  FA for 90 min.

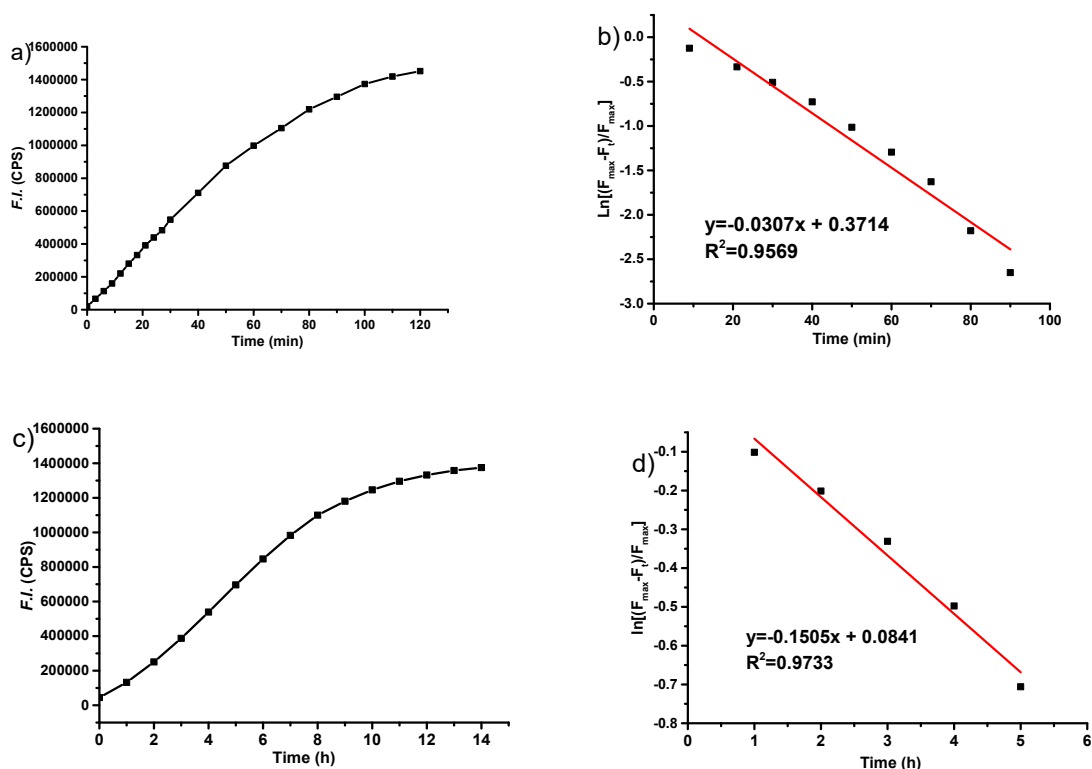

**Figure S8** a) Time-dependent (0 – 120 min) fluorescence intensity of the **NAP-FAP2-1** (1  $\mu\text{M}$ ) upon incubation with 50  $\mu\text{M}$  FA at 550 nm ( $\lambda_{\text{ex}}=430$  nm) and b) the corresponding linear regression of  $\ln[(F_{\max}-F_t)/F_{\max}]$  versus incubation time (10 - 90 min). The calculated pseudo first-order reaction kinetic constant was  $0.0307 \text{ min}^{-1}$ , and the second-order reaction kinetic constant was  $10.2 \text{ M}^{-1}\text{s}^{-1}$ ; c) Time-dependent (0 - 14 h) fluorescence intensity of the **NAP-FAP2-1** (1  $\mu\text{M}$ ) self-hydrolysis at 550 nm ( $\lambda_{\text{ex}}=430$  nm) and d) corresponding linear regression of  $\ln[(F_{\max}-F_t)/F_{\max}]$  versus t (1-5 h). The calculated pseudo first-order reaction kinetic constant was  $0.1505 \text{ h}^{-1}$  ( $0.0025 \text{ min}^{-1}$ ), and the second-order reaction kinetic constant was  $7.5 \times 10^{-7} \text{ M}^{-1}\text{s}^{-1}$ .

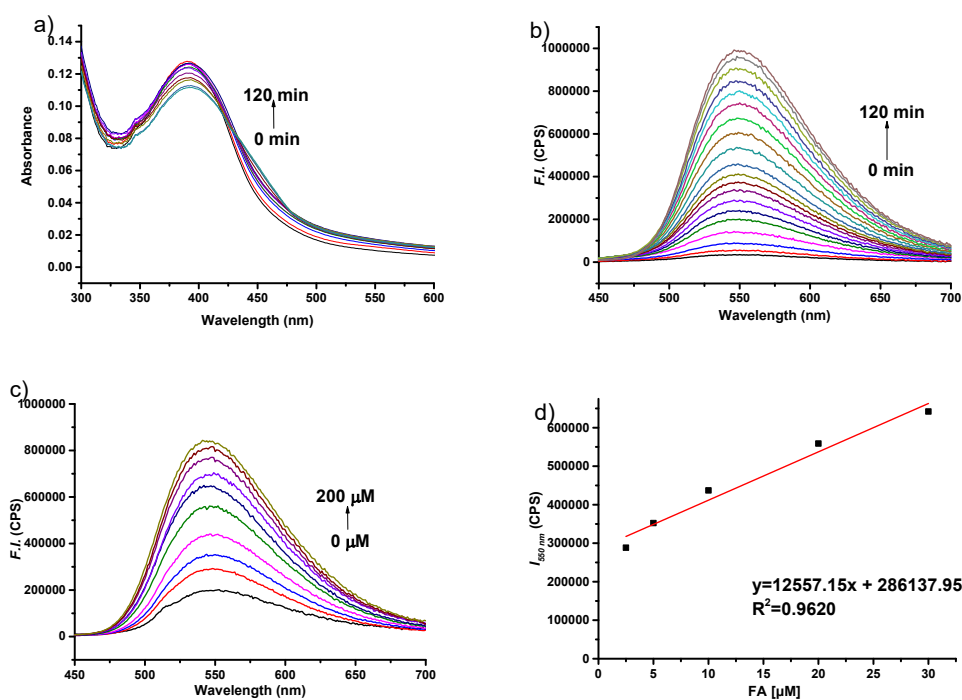

**Figure S9** a) Time-dependent absorption spectra of the probe **NAP-FAP2-2** (10 μM) upon addition of 500 μM FA; b) Time-dependent fluorescence emission spectra ( $\lambda_{ex}=438$  nm) of the probe **NAP-FAP2-2** (1 μM) upon addition of 50 μM FA with 28.1 fold of fluorescence intensity increase at 550 nm; c) Concentration-dependent fluorescence emission spectra ( $\lambda_{ex}=438$  nm) of the **NAP-FAP2-2** (1 μM) upon addition of increasing amount of FA (0-200 μM); d) Linear regression of the fluorescence intensity at 550 nm ( $\lambda_{ex}=438$  nm) versus FA concentrations (2.5 to 30 μM): the limit of detection (LOD,  $S/N=3$  and  $N=3892$  CPS) = 0.93 μM.

## Part IV: HRMS and <sup>1</sup>HNMR Studies of Reaction Products

### 4.1 HRMS studies of reaction mixture of the probe NAP-FAP2-1 with FA.

To a suspended solution of the probe NAP-FAP2-1 (4.3 mg, 0.010 mmol) in 1 mL THF was added 10 equiv. FA (40% FA in H<sub>2</sub>O, 7.5 μL). The mixture was stirred at 37 °C for 8 h. The reaction solution was extracted with ethyl acetate. The organic phase was separated, dried in vacuo, then taken for HRMS analysis. The peak m/z 255.1135 was assigned to the [M+H]<sup>+</sup> peak of the 4-amino-1,8-naphthalimide **4** with the calculated value m/z as 255.1134 (Scheme S3).

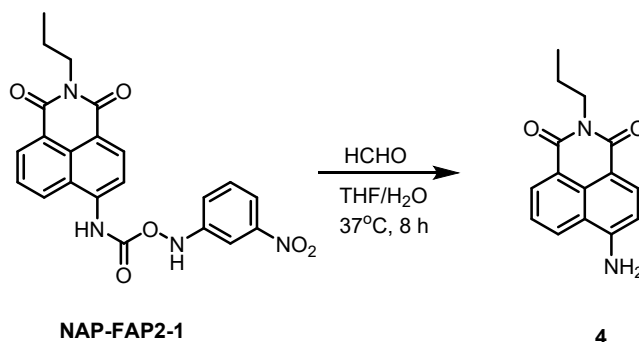

Scheme 3 Scale-up reaction of the probe NAP-FAP2-1 and FA in THF and water.

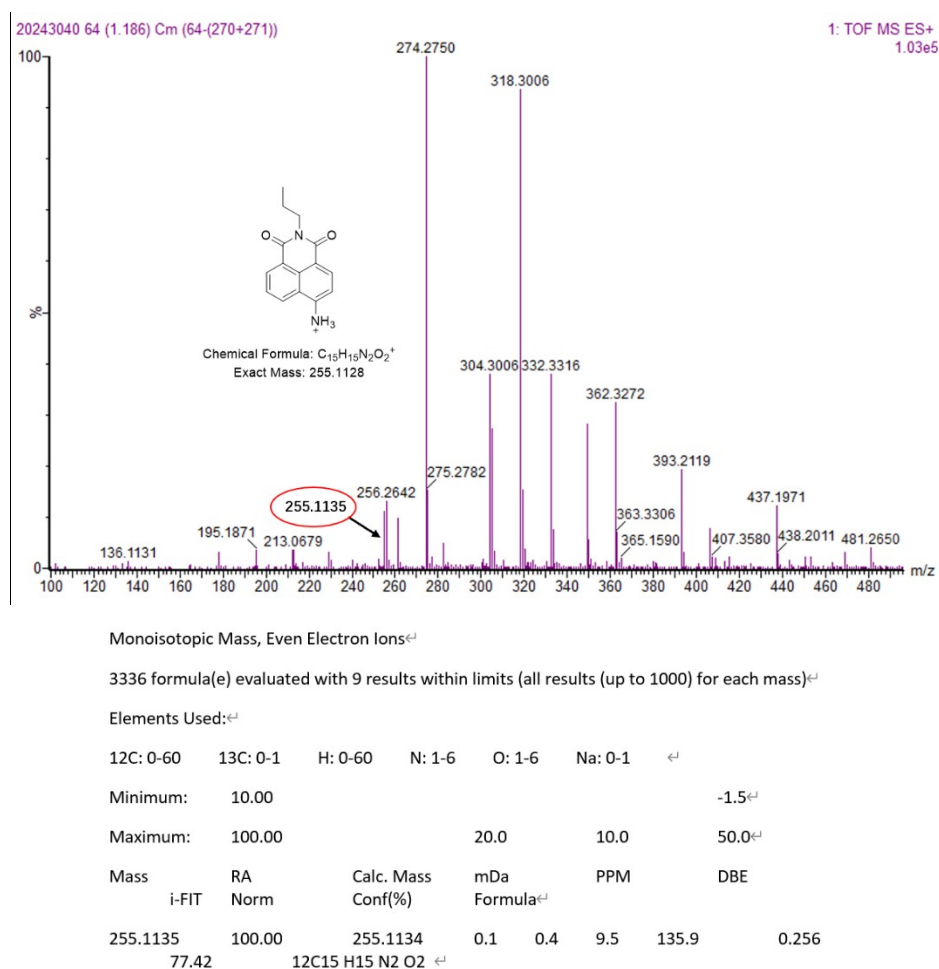

Figure S10 ESI-HRMS spectrum of the reaction mixture of NAP-FAP2-1 and FA.

## 4.2 <sup>1</sup>HNMR studies of reaction mixture of the probe NAP-FAP2-1 with FA

To a suspended solution of the probe NAP-FAP2-1 (6.5 mg, 0.015 mmol) in 1.5 mL THF was added 10 equiv. FA (40% FA in H<sub>2</sub>O, 11.3 μL). The mixture was stirred at 37 °C for 8 h. The reaction solution was extracted with ethyl acetate. The organic phase was separated, dried in vacuo, the residue was purified by silica gel chromatography column using methylene chloride and methanol (20:1, v/v), then taken for <sup>1</sup>HNMR analysis.

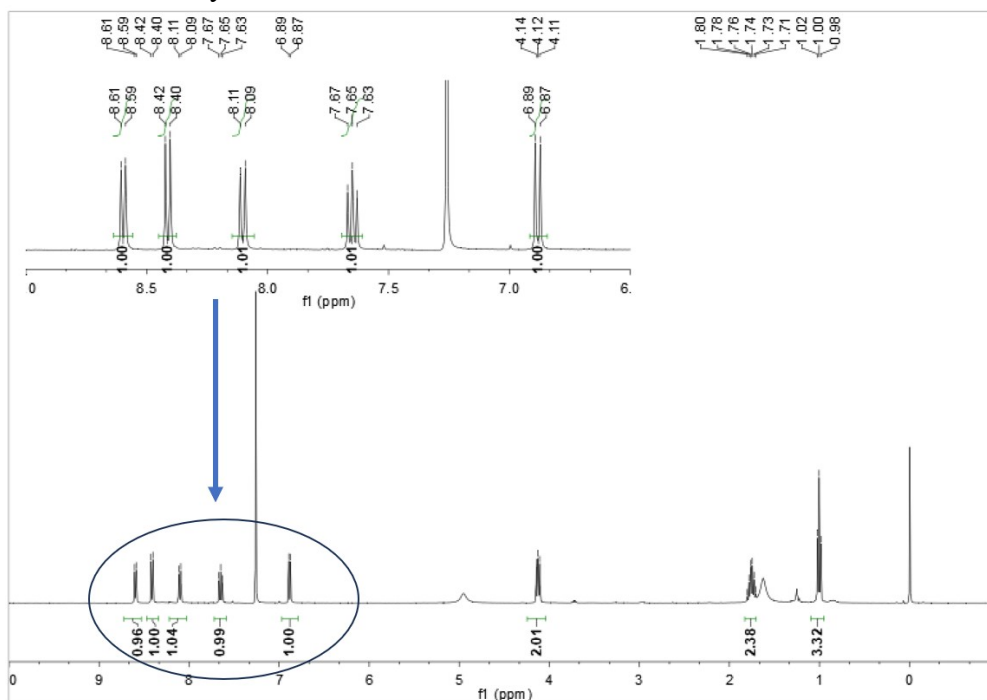

Figure S11 <sup>1</sup>H NMR spectrum of the 4-amino-1,8-naphthalimide.

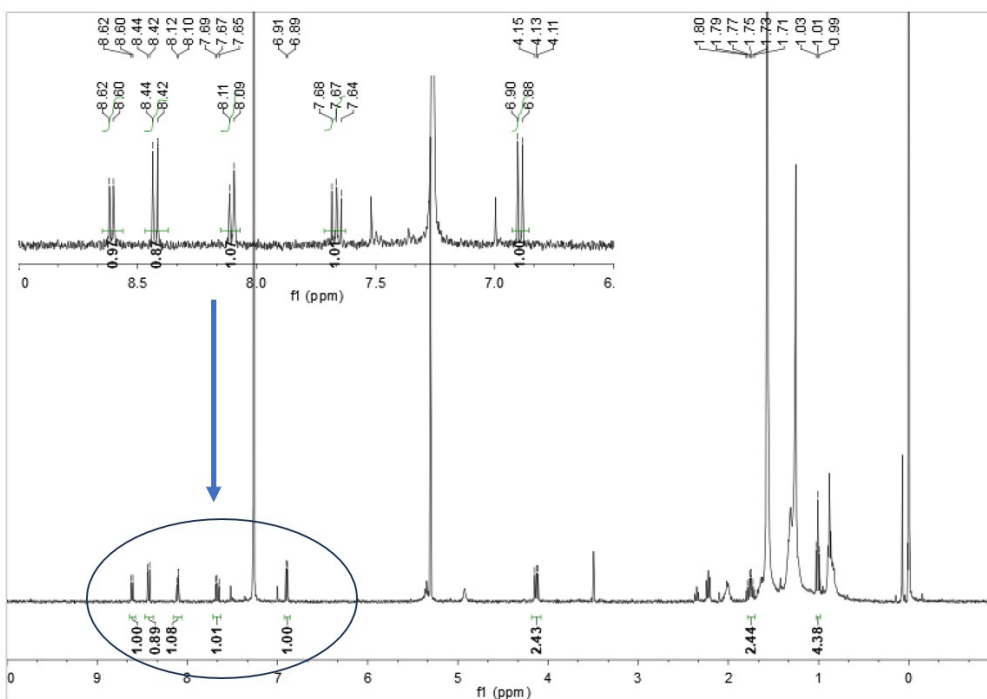

Figure S12 <sup>1</sup>H NMR spectrum of the product from reaction mixture of NAP-FAP2-1 and FA..

## Part V Theoretical Calculations

All theoretical calculations [density functional theory (DFT) and the time-dependent DFT (TDDFT)] were carried out using Gaussian 09 software.<sup>32</sup> The ground state structures of the simplified probe structure **NAP-FAP2-Me** (Figure S8), was optimized using DFT with B3LYP functional and 6-31G (d, p) basis set (considered as in gas phase). The excited state related calculations were carried out with the TDDFT, based on the optimized structure of the ground state. There are no imaginary frequencies in all calculated structures during the frequency analysis.

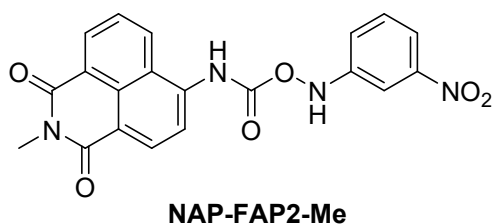

**Figure S13** Structure of **NAP-FAP2-Me**

**Table S2** Atomic coordinates of the ground state structure optimized from DFT B3LYP/6-31G (d,p).

| Atom# | Atom Type | x        | y        | z        |
|-------|-----------|----------|----------|----------|
| 1     | C         | 4.664226 | -2.39309 | -0.20907 |
| 2     | C         | 3.448762 | -3.05702 | 0.043518 |
| 3     | C         | 2.292477 | -2.33702 | 0.278222 |
| 4     | C         | 2.290921 | -0.9164  | 0.26788  |
| 5     | C         | 3.533492 | -0.24775 | 0.027223 |
| 6     | C         | 4.706778 | -1.01025 | -0.21279 |
| 7     | C         | 1.121857 | -0.10826 | 0.491513 |
| 8     | C         | 1.217501 | 1.276811 | 0.501195 |
| 9     | C         | 2.454704 | 1.904353 | 0.276816 |
| 10    | C         | 3.601141 | 1.168886 | 0.034767 |
| 11    | N         | -0.10408 | -0.77271 | 0.679179 |
| 12    | C         | -1.29643 | -0.24302 | 1.084714 |
| 13    | O         | -1.55605 | 0.906956 | 1.373696 |
| 14    | O         | -2.21475 | -1.27479 | 1.163886 |
| 15    | N         | -3.52117 | -0.8411  | 1.553133 |
| 16    | C         | -4.39526 | -0.7191  | 0.442686 |
| 17    | C         | -5.44313 | 0.204516 | 0.529056 |
| 18    | C         | -6.37501 | 0.251119 | -0.50342 |
| 19    | C         | -6.30145 | -0.57228 | -1.62582 |
| 20    | C         | -5.24507 | -1.48026 | -1.69534 |
| 21    | C         | -4.30034 | -1.5662  | -0.67099 |
| 22    | C         | 4.880837 | 1.873706 | -0.21123 |
| 23    | N         | 6.008688 | 1.068936 | -0.45343 |

|    |   |          |          |          |
|----|---|----------|----------|----------|
| 24 | C | 6.003422 | -0.32861 | -0.46868 |
| 25 | O | 7.039055 | -0.94792 | -0.68633 |
| 26 | O | 4.967536 | 3.096105 | -0.20826 |
| 27 | C | 7.301078 | 1.721056 | -0.70698 |
| 28 | N | -7.47863 | 1.227771 | -0.40361 |
| 29 | O | -8.28818 | 1.272064 | -1.33    |
| 30 | O | -7.52575 | 1.939964 | 0.600275 |
| 31 | H | 5.579387 | -2.94448 | -0.39575 |
| 32 | H | 3.420791 | -4.14176 | 0.060803 |
| 33 | H | 1.386226 | -2.89658 | 0.489981 |
| 34 | H | 0.334446 | 1.873669 | 0.680526 |
| 35 | H | 2.522069 | 2.986924 | 0.281978 |
| 36 | H | -0.1291  | -1.76663 | 0.505449 |
| 37 | H | -3.38925 | 0.054049 | 2.027465 |
| 38 | H | -5.5452  | 0.877304 | 1.372676 |
| 39 | H | -7.04705 | -0.49488 | -2.40627 |
| 40 | H | -5.15931 | -2.13677 | -2.55526 |
| 41 | H | -3.49185 | -2.28501 | -0.72927 |
| 42 | H | 7.686023 | 1.406485 | -1.67912 |
| 43 | H | 7.140962 | 2.796071 | -0.68593 |
| 44 | H | 8.020328 | 1.425081 | 0.059916 |

**Table S3** Overview of theoretical calculations of main electron transitions based on TDDFT//B3LYP/6-31G(d,p) calculation on the optimized ground structure of **NAP-FAP2-Me**

| Electronic Transition | TDDFT//B3LYP/6-31G(d,p) |        |                           |                 |
|-----------------------|-------------------------|--------|---------------------------|-----------------|
|                       | Energy (eV)             | $f$    | Main Configuration        | CI coefficients |
| $S_0 \rightarrow S_1$ | 3.38 eV, 367 nm         | 0.2351 | HOMO $\rightarrow$ LUMO+1 | 0.6573          |
| $S_0 \rightarrow S_2$ | 3.39 eV, 366 nm         | 0.0909 | HOMO $\rightarrow$ LUMO   | 0.6254          |
| $S_0 \rightarrow S_3$ | 3.53 eV, 352 nm         | 0.0159 | HOMO-1 $\rightarrow$ LUMO | 0.6079          |



## Part VI: Detection of FA in Live Cells

**Cell culture:** The murine macrophage RAW264.7 cell lines were kindly provided by Stem Cell Bank, Chinese Academy of Sciences. RAW264.7 cells were cultured in DMEM media (Adamas) supplied with 10% Fetal Bovine Serum (FBS, Sangon Biotech), 1% Penicillin-Streptomycin (Gibco) at 37 °C in a humidified atmosphere containing 95% air and 5% CO<sub>2</sub>.

### 6.1 Cytotoxicity assay of the NAP-FAP2-1 and NAP-FAP2-2 for RAW264.7 cells

Cell growth assay was performed using Cell Counting Kit-8 (Elabscience Biotechnology). Cells were seeded in 96-well plates with an initial seeding density of 10000 cells per well. Solutions of NAP-FAP2-1 and NAP-FAP2-2 (0, 5, 10, 20, 50 and 100 μM) were added into the wells and incubated for 8 h at 37°C. 2-(2-Methoxy-4-nitrophenyl)-3-(4-nitrophenyl)-5-(2,4-disulfobenzene)-2H-tetrazole monosodium salt (CCK8, 10 μL) was then added into each well for further incubation 1 h. Absorbance was read by a microplate reader (BioTek Synergy Lx) at wavelength λ=450 nm.

$$\text{Cell Viability (\% of control)} = (\text{Medicated cells OD} / \text{Control cells OD}) * 100\%$$

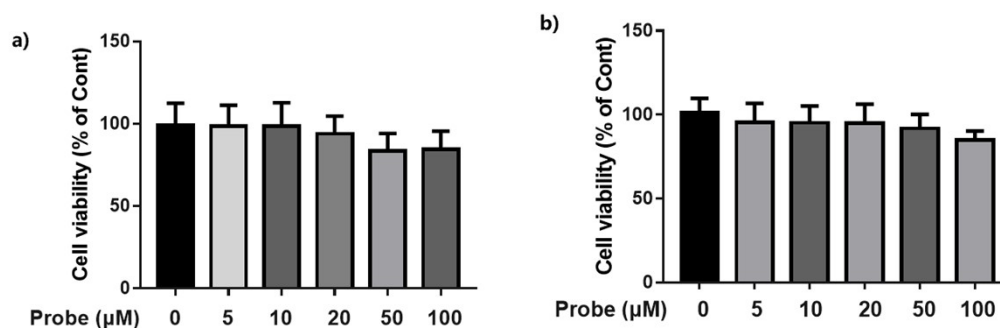

**Figure S14** a) Cell viabilities of RAW264.7 cells incubated with NAP-FAP2-1 at various concentrations for 8 h; b) Cell viabilities of RAW264.7 cells incubated with NAP-FAP2-2 at various concentrations for 8 h.

### 6.2 Confocal fluorescence imaging studies of NAP-FAP2-1 for FA level changes in RAW264.7 cells due to exogenous FA incubation

RAW264.7 cells were seeded in a T-25 cell culture flask in DMEM medium with 10% Fetal Bovine Serum and 1% Penicillin-Streptomycin at 37 °C for 48 hours. One day before the experiment, RAW264.7 cells were transferred to Nunc 35 mm glass-bottom cell culture dishes (Thermo Scientific) to allow the cells to adhere. For imaging studies, three groups of cells were incubated without FA, 100 μM FA, and 200 μM FA, respectively for 1 h. Another group of cells were co-incubated with 200 μM FA and 300 μM NaHSO<sub>3</sub> for 1 h. Then, the cells were washed with HBSS and then incubated with 20 μM NAP-FAP2-1 in culture medium for 90 min. After incubation, fresh culture medium was replaced, then cell fluorescence images were captured on a Leica TCS SP8 equipped with 63× objective lens and PMT gain of 800 (λ<sub>ex/em</sub> = 458/555±25 nm). The results were shown in **Figure 4**.

### 6.3 Confocal fluorescence imaging studies of NAP-FAP2-1 for FA level changes during erastin-induced ferroptosis in RAW264.7 cells

RAW264.7 cells were seeded in a T-25 cell culture flask in DMEM medium with 10% Fetal Bovine Serum and 1% Penicillin-Streptomycin at 37 °C for 48 hours. One day before the experiment,

RAW264.7 cells were transferred to Nunc 35 mm glass-bottom cell culture dishes (Thermo Scientific) to allow the cells to adhere. For imaging the ferroptosis process, RAW 264.7 cells were treated with 10  $\mu\text{M}$  erastin in the presence or absence of 10  $\mu\text{M}$  Fer-1 at 37  $^{\circ}\text{C}$  for the indicated times (0, 4 and 8 h). The cells were washed with HBSS and then incubated with 20  $\mu\text{M}$  **NAP-FAP2-1** in culture medium for 90 min. After incubation, the cell medium were replaced with a new culture medium, then imaged on a Leica TCS SP8 equipped with 63 $\times$  objective lens and PMT gain of 800 ( $\lambda_{\text{ex/em}} = 458/555 \pm 25$  nm). Results were shown in **Figure 5**.

#### 6.4 Confocal fluorescence imaging studies of **NAP-FAP2-2** and ER Red tracker in RAW 264.7 cells due to exogenous FA incubation

RAW 264.7 cells were seeded in a T-25 cell culture flask in DMEM medium with 10% Fetal Bovine Serum and 1% Penicillin-Streptomycin at 37  $^{\circ}\text{C}$  for 48 hours. One day before the experiment, cells were transferred to Nunc 35 mm glass-bottom cell culture dishes (Thermo Scientific) to allow the cells to adhere. For colocalization imaging studies, cells were incubated with FA (0, 100, and 200  $\mu\text{M}$ ) for 1 h. Another group co-incubated with 200  $\mu\text{M}$  FA and 300  $\mu\text{M}$   $\text{NaHSO}_3$  for 1 h. Then, the cells were washed with HBSS and then incubated with 20  $\mu\text{M}$  **NAP-FAP2-2** in culture medium for 90 min, and then 200 nM ER Tracker Red was added and incubated for further 20 min, the cells were washed with HBSS and then imaged on a Leica TCS SP8 equipped with 40 $\times$  objective lens and PMT gain of 800 ( $\lambda_{\text{ex/em}} = 458/555 \pm 25$  nm,  $\lambda_{\text{ex/em}} = 561/610 \pm 15$  nm). Pearson's colocalization coefficients were analyzed with Image J software. The results were shown in **Figure S15**.

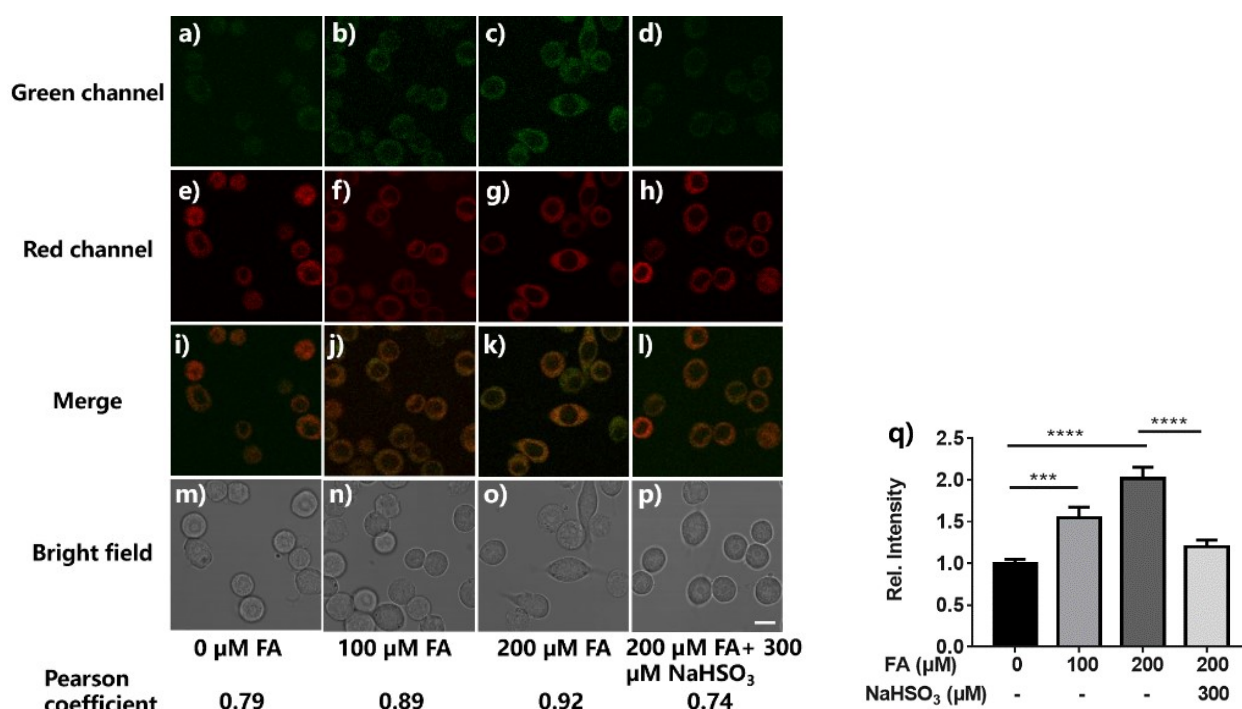

**Figure S15** Colocalization fluorescence imaging studies of **NAP-FAP2-2** and ER Red for exogenous FA incubation in RAW 264.7 cells: a, e, i, m) Cells were incubated in normal media and then incubated in 20  $\mu\text{M}$  **NAP-FAP2-2** for 90 min and then 200 nM ER Tracker Red for 20 min; b, f, j, n) Cells were incubated in 100  $\mu\text{M}$  FA for 1 h, and then incubated in 20  $\mu\text{M}$  **NAP-FAP2-2** for 90 min and then 200 nM ER Tracker Red for 20 min; c, g, k, o) Cells were incubated in 200  $\mu\text{M}$  FA for 1 h, and then incubated in 20  $\mu\text{M}$  **NAP-FAP2-2** for 90 min and then 200 nM ER Tracker Red for 20 min; d, h, l, p)

Cells were incubated in 200  $\mu\text{M}$  FA and 300  $\mu\text{M}$   $\text{NaHSO}_3$  for 1 h, and then incubated in 20  $\mu\text{M}$  **NAP-FAP2-2** for 90 min and then 200 nM ER Tracker Red for 20 min; m-p) Corresponding bright-field images; q) Relative fluorescence intensities of RAW 264.7 cells in green channel of the fluorescence images in different cell groups. Cell images were captured on a Leica TCS with 63 $\times$  objective lens and PMT gain of 800 ( $\lambda_{\text{ex/em}} = 458/555 \pm 25$  nm,  $\lambda_{\text{ex/em}} = 561/610 \pm 15$  nm), scale bar = 10  $\mu\text{m}$ . (Error bars represent the standard deviations of three replicates; \*\*\*\*P  $\leq$  0.0001, \*\*\*P  $\leq$  0.001.)

**Standard procedure for probe incubation and flow cytometry analysis:** The cells were washed with HBSS and then incubated with 20  $\mu\text{M}$  **NAP-FAP2-1** or **NAP-FAP2-2** in culture medium for 90 min. After incubation, the cells were washed with HBSS and then subjected to mild centrifugation at 350 $\times$ g for 5 min. The supernatant was discarded, and cells was resuspended in 200  $\mu\text{L}$  PBS and kept at 4  $^\circ\text{C}$  in dark for analysis with a flow cytometer (Beckman Instruments, USA,  $\lambda_{\text{ex/em}} = 488/585$  nm).

### 6.5 Flow cytometry studies of NAP-FAP2-1 for FA level changes in RAW 264.7 cells due to exogenous FA incubation

RAW264.7 cells were seeded in a T-25 cell culture flask in DMEM medium with 10% Fetal Bovine Serum and 1% Penicillin-Streptomycin at 37  $^\circ\text{C}$  for 48 hours. One day before the experiment, cells were transferred to a 35 mm tissue culture dishes (Thermo Scientific) to allow the cells to adhere. Cells were incubated with FA (0, 100, and 200  $\mu\text{M}$ ) for 1 h. Another group was co-incubated with 200  $\mu\text{M}$  FA and 300  $\mu\text{M}$   $\text{NaHSO}_3$  for 1 h, and then was subjected to the standard procedure shown above using the probe **NAP-FAP2-1** for further probe incubation and flow cytometry analysis. Results were shown in Figure S16.

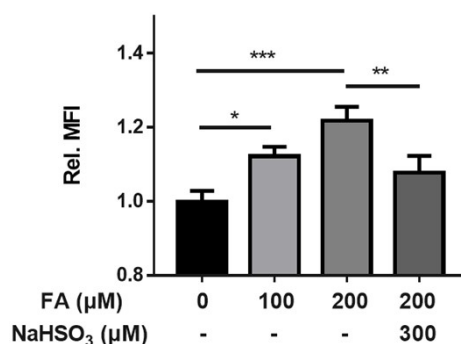

**Figure S16** Flow cytometry analysis of relative fluorescence intensities of RAW 264.7 cells upon treatment with different concentrations of FA in the presence or absence of 300  $\mu\text{M}$   $\text{NaHSO}_3$  for 1 h. (Error bars represent the standard deviations of three replicates, \*\*\*\*P  $\leq$  0.0001, \*\*\*P  $\leq$  0.001, \*\*P  $\leq$  0.01, \*P  $\leq$  0.1).

### 6.6 Flow cytometry studies of FA level changes in cytoplasm and endoplasmic reticulum during erastin-induced ferroptosis in RAW264.7 cells

RAW264.7 cells were seeded in a T-25 cell culture flask in DMEM medium with 10% Fetal Bovine Serum and 1% Penicillin-Streptomycin at 37  $^\circ\text{C}$  for 48 hours. One day before the experiment, cells were transferred to a to a 35mm tissue culture dishes (Thermo Scientific) to allow the cells to adhere. For studying the ferroptosis process, RAW264.7 cells were treated with 10  $\mu\text{M}$  erastin (diluted from 20 mM stock in DMSO with the cell culture media) in the presence or absence of 10  $\mu\text{M}$  Fer-

1(diluted from 50 mM stock in DMSO with the cell culture media) at 37 °C for the indicated times (0, 4, and 8 h), and then proceed to flow cytometry analysis. And then applied the standard procedure using the probe **NAP-FAP2-1** and **NAP-FAP2-2** for probe incubation and cytometry analysis. The results were shown in **Figure 6**.

## Part VIII: NMR and HRMS Data

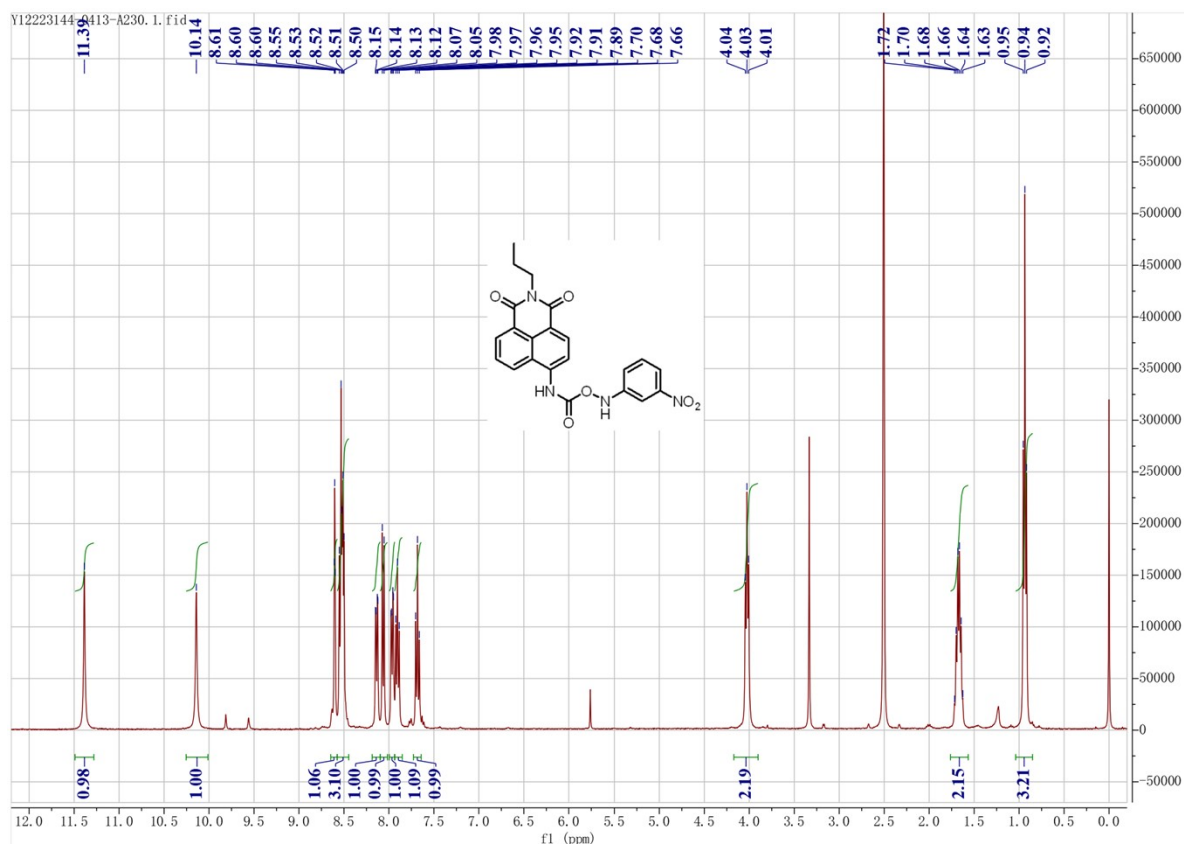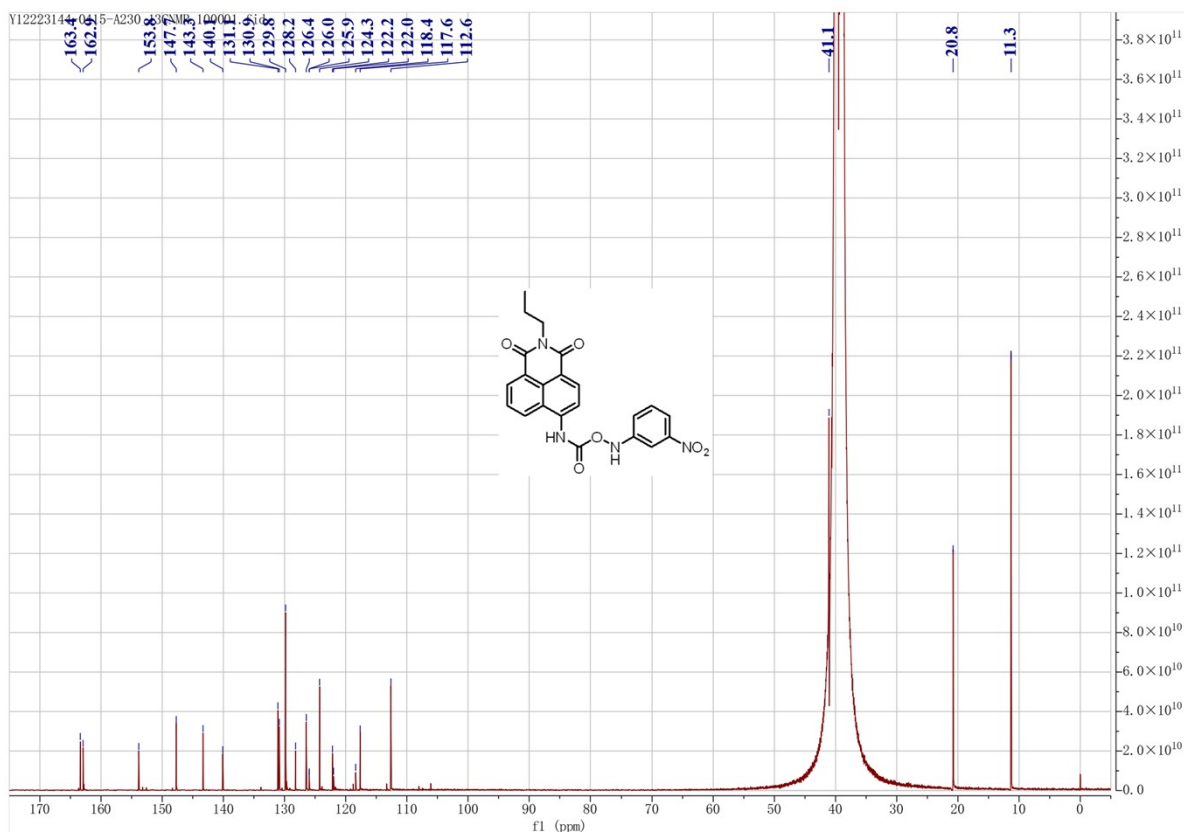

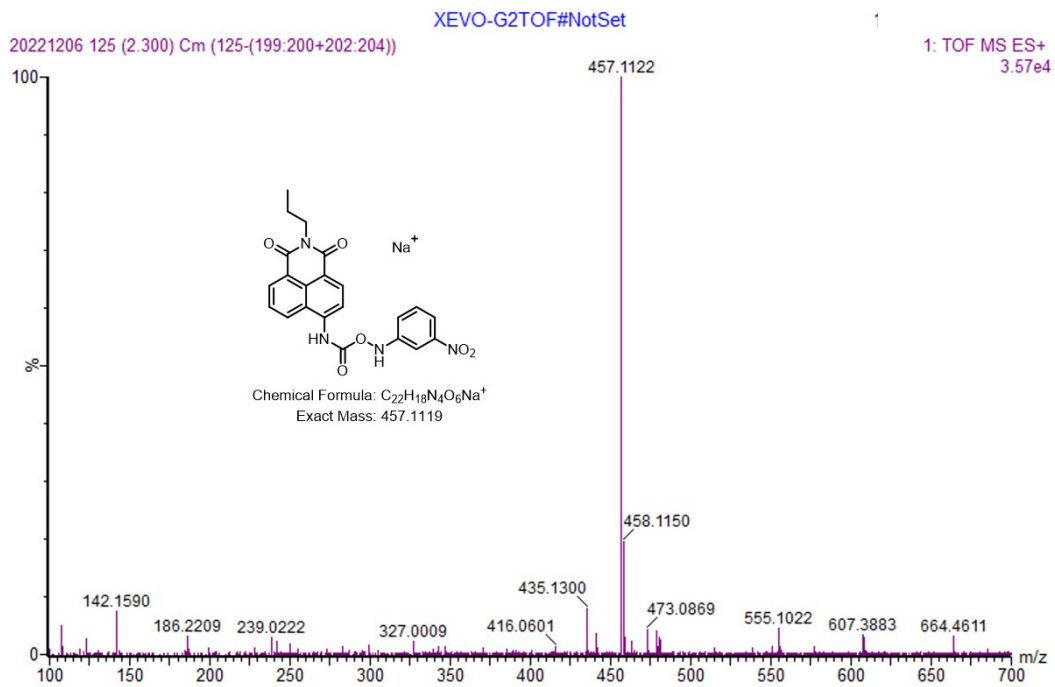

**Figure S17** <sup>1</sup>H NMR, <sup>13</sup>C NMR, and HRMS of the probe **NAP-FAP2-1**

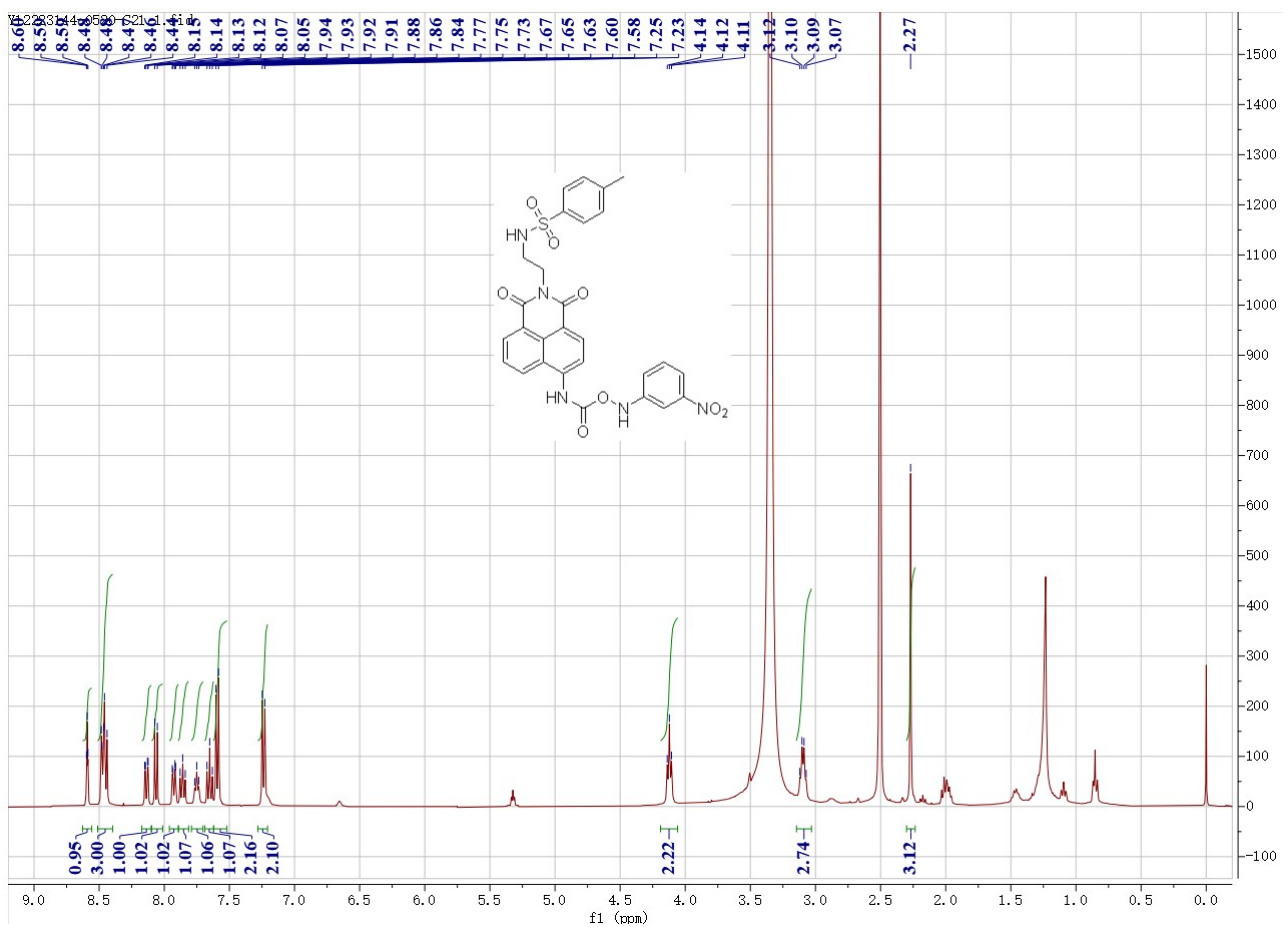

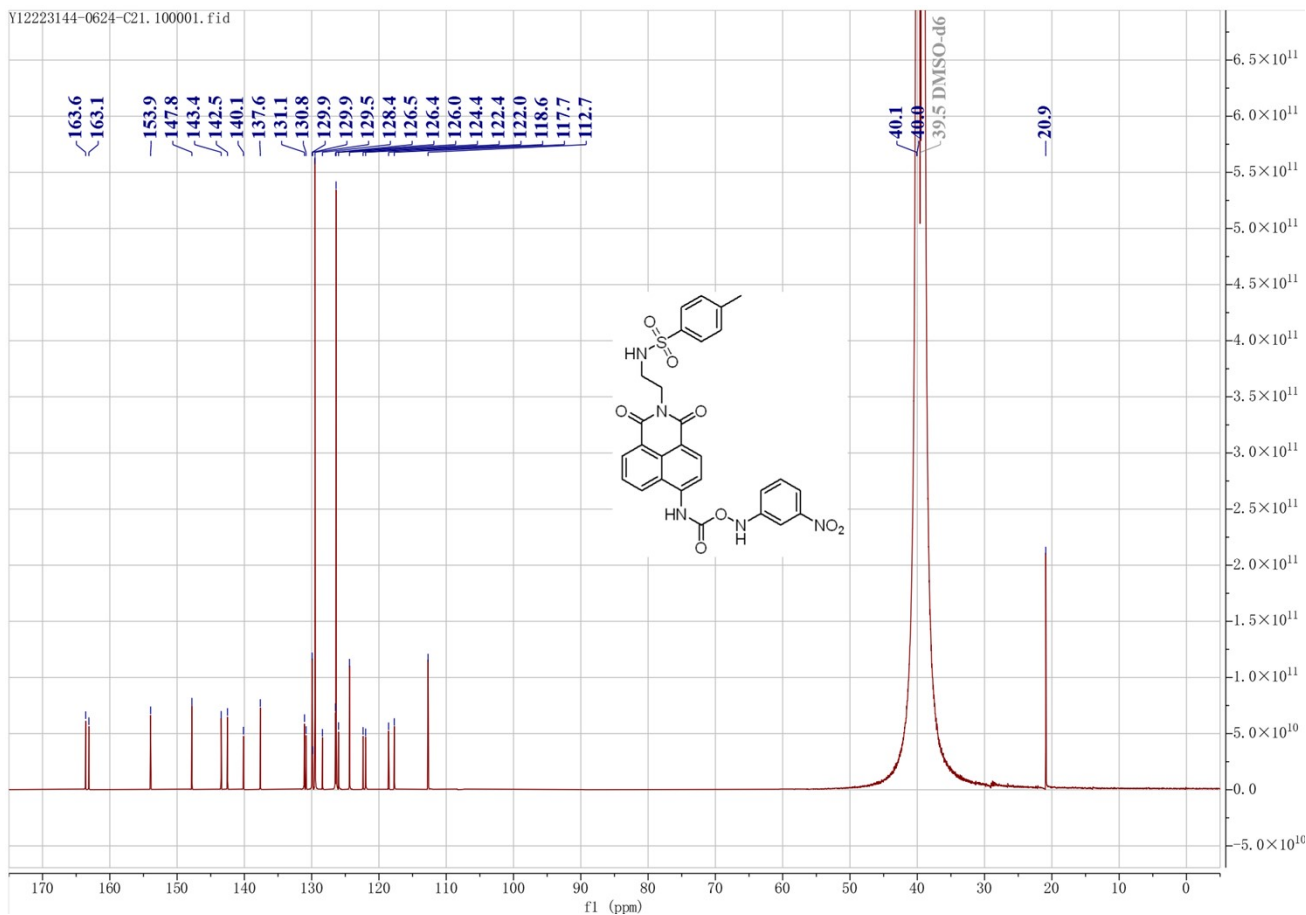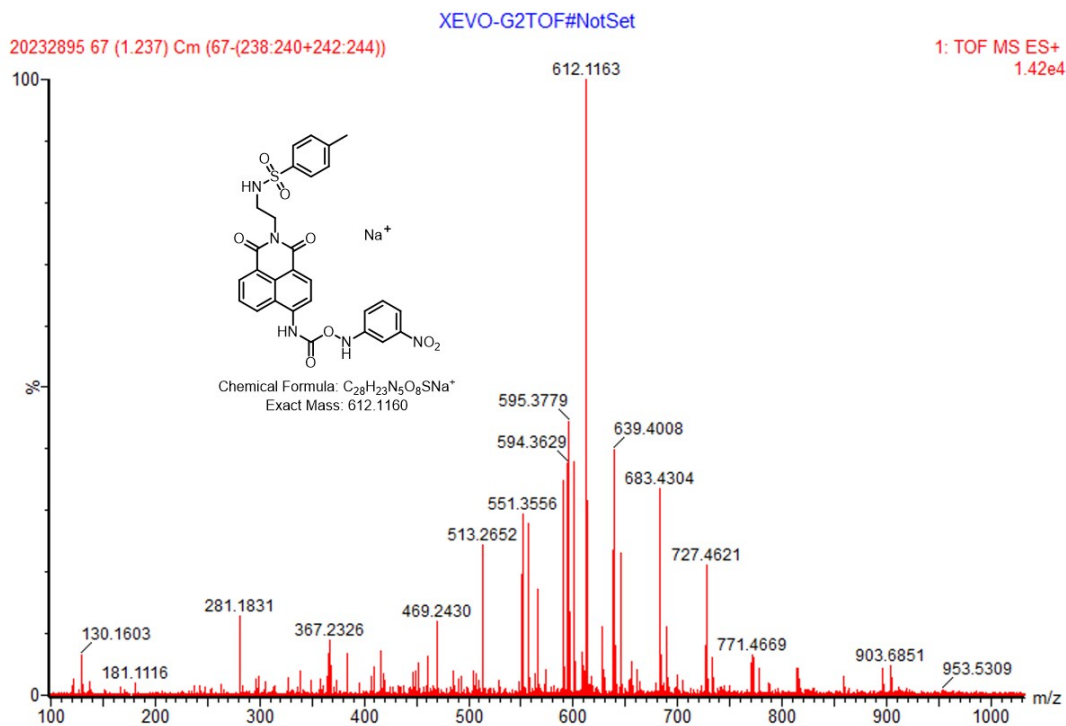

**Figure S18**  $^1H$  NMR,  $^{13}C$  NMR, and HRMS of the probe NAP-FAP2-2.

## References

1. Brewer, T. F.; Chang, C. J., *J. Am. Chem. Soc.* **2015**, *137* (34), 10886-10889.
2. Roth, A.; Li, H.; Anorma, C.; Chan, J., *J. Am. Chem. Soc.* **2015**, *137* (34), 10890-10893.
3. Brewer, T. F.; Burgos-Barragan, G.; Wit, N.; Patel, K. J.; Chang, C. J., *Chem. Sci.* **2017**, *8* (5), 4073-4081.
4. Bruemmer, K. J.; Walvoord, R. R.; Brewer, T. F.; Burgos-Barragan, G.; Wit, N.; Pontel, L. B.; Patel, K. J.; Chang, C. J., *J. Am. Chem. Soc.* **2017**, *139* (15), 5338-5350.
5. Quan, T.; Liang, Z.; Pang, H.; Zeng, G.; Chen, T., *Analyst* **2022**, *147* (2), 252-261.
6. Tenney, L.; Pham, V. N.; Brewer, T. F.; Chang, C. J., *Chem. Sci.* **2024**, *15* (21), 8080-8088.
7. Zhang, Y.; Du, Y.; Liao, K.; Peng, T., *Anal. Methods* **2024**, *16* (23), 3646-3653.
8. Liu, J.; Li, K.; Xue, P.; Xu, J., *Anal. Biochem.* **2022**, *652*, 114749.
9. Deng, B.; Ding, L.; Yang, S.; Tian, H., *Luminescence* **2023**, *38* (9), 1647-1653.
10. Liang, Y.; Zhang, Y.; Li, M.; Meng, Z.; Gong, S.; Du, W.; Yang, Y.; Wang, Z.; Wang, S., *Microchem. J.* **2022**, *177*, 107305.
11. Tantipanjaporn, A.; Ka-Yan Kung, K.; Sit, H.-Y.; Wong, M.-K., *RSC Adv.* **2022**, *12* (18), 11543-11547.
12. Wang, Y.; Chen, Y.; Huang, Y.; Zhang, Q.; Zhang, Y.; Li, J.; Jia, C., *Anal. Methods* **2019**, *11* (17), 2311-2319.
13. Tang, Y.; Kong, X.; Xu, A.; Dong, B.; Lin, W., *Angew. Chem. Int. Ed.* **2016**, *55* (10), 3356-3359.
14. Wang, P.; Cheng, X.; Xiong, J.; Mao, Z.; Liu, Z., *Angew. Chem. Int. Ed.* **2022**, *40* (12), 1457-1463.
15. Chen, H.-W.; Li, H.; Song, Q.-H., *ACS Omega* **2018**, *3* (12), 18189-18195.
16. Ding, N.; Li, Z.; Hao, Y.; Zhang, C., *Anal. Chem.* **2022**, *94* (35), 12120-12126.
17. Wu, F.; Zhang, Y.; Huang, L.; Xu, D.; Wang, H., *Anal. Methods* **2017**, *9* (37), 5472-5477.
18. Wang, S.; Zou, Y.; Zhou, Y.; Hu, Y.; Yang, J.; Hou, Y.; Cheng, H., *Chem. Phys. Lett.* **2023**, *831*, 140846.
19. Wang, H.; Zhang, Y.; Rong, X.; Wang, B.; Wang, L.; Wang, C.; Gao, W.; Ye, X.; Hou, X.; Liu, W.; Wu, M.; Cheng, Y.; Shu, X.; Shang, J., *Spectrochim. Acta, Part A* **2024**, *313*, 124105.
20. Ding, N.; Li, Z.; Hao, Y.; Yang, X., *Food Chem.* **2022**, *384*, 132426.
21. Cao, T.; Gong, D.; Han, S.-C.; Iqbal, A.; Qian, J.; Liu, W.; Qin, W.; Guo, H., *Talanta* **2018**, *189*, 274-280.
22. He, L.; Yang, X.; Ren, M.; Kong, X.; Liu, Y.; Lin, W., *Chem. Commun.* **2016**, *52* (61), 9582-9585.
23. Liu, C.; Jiao, X.; He, S.; Zhao, L.; Zeng, X., *Dyes Pigm.* **2017**, *138*, 23-29.
24. Jana, A.; Joseph, M. M.; Munan, S.; K, S.; Maiti, K. K.; Samanta, A., *J. Photochem. Photobiol., B.* **2021**, *214*, 112091.
25. Cai, S.; Liu, C.; Gong, J.; He, S.; Zhao, L.; Zeng, X., *Spectrochim. Acta, Part A.* **2021**, *245*, 118949.
26. Jana, A.; Baruah, M.; Munan, S.; Samanta, A., *Chem. Commun.* **2021**, *57* (52), 6380-6383.
27. Xu, H.; Xu, H.; Ma, S.; Chen, X.; Huang, L.; Chen, J.; Gao, F.; Wang, R.; Lou, K.; Wang, W., *J. Am. Chem. Soc.* **2018**, *140* (48), 16408-16412.
28. Bi, A.; Liu, M.; Huang, S.; Zheng, F.; Ding, J.; Wu, J.; Tang, G.; Zeng, W., *Chem. Commun.* **2021**, *57* (28), 3496-3499.
29. Khosravi, A.; Moradian, S.; Gharanjig, K.; Afshar Taromi, F., *Dyes Pigm.* **2006**, *69* (1), 79-92.
30. Hojczyk, K. N.; Feng, P.; Zhan, C.; Ngai, M.-Y., *Angew. Chem. Int. Ed.* **2014**, *53* (52), 14559-14563.
31. Xu, A.; Tang, Y.; Lin, W., *Spectrochimica Acta Part A: Molecular and Biomolecular Spectroscopy* **2018**, *204*, 770-776.
32. Frisch, M. J.; Trucks, G. W.; Schlegel, H. B.; Scuseria, G. E.; Robb, M. A.; Cheeseman, J. R.; Scalmani, G.; Barone, V.; Mennucci, B.; Petersson, G. A.; Nakatsuji, H.; Caricato, M.; Li, X.; Hratchian, H. P.; Izmaylov, A. F.; Bloino, J.; Zheng, G.; Sonnenberg, J. L.; Hada, M.; Haraha, M.; Toyota, K.; Fukuda, R.; Hasegawa, J.; Ishida, M.; Nakajima, T.; Honda, Y.; Kitao, O.; Nakai, H.; Vreven, T.; Montgomery Jr., J. A.; Peralta, J. E.; Ogliaro, F.; Bearpark, M. J.; Heyd, J.; Brothers, E. N.; Kudin, K. N.; Staroverov, V. N.; Kobayashi, R.; Normand, J.; Raghavachari, K.; Rendell, A. P.; Burant, J. C.; Iyengar, S. S.; Tomasi, J.; Cossi, M.; Rega, N.; Millam, N. J.; Klene, M.; Knox, J. E.; Cross, J. B.; Bakken, V.; Adamo, C.; Jaramillo, J.; Gomperts, R.; Stratmann, R. E.; Yazyev, O.; Austin, A. J.; Cammi, R.; Pomelli, C.; Ochterski, J. W.; Martin, R. L.; Morokuma, K.; Zakrzewski, V. G.; Voth, G. A.; Salvador, P.; Dannenberg, J. J.; Dapprich, S.; Daniels, A. D.; Farkas, Ö.; Foresman, J. B.; Ortiz, J. V.; Cioslowski, J.; Fox, D. J. *Gaussian 09*, Gaussian, Inc.: Wallingford, CT, USA, **2009**.
